# Supplementary material for: Structural and spectroscopic elucidation of imidazolium and pyridinium based hexachloridophosphates and niobates
Source: Royal Society of Chemistry journal article supplement (doi:10.1039/b919368e), 2010-01-01
Supplement: b919368e.pdf [file b919368e.pdf]

## Supporting informations

### **Structural and spectroscopic elucidation of imidazolium and pyridinium based hexachloridophosphates and niobates**

Mimoza Gjikaj,\* Johann-Christian Leye, Tao Xie and Wolfgang Brockner

<sup>a</sup>Institute of Inorganic and Analytical Chemistry, Clausthal University of Technology, Clausthal-Zellerfeld, Germany. E-mail: [mimoza.gjikaj@tu-clausthal.de](mailto:mimoza.gjikaj@tu-clausthal.de); Fax: +49 5323 722995; Tel: +49 5323 7228587

## NMR spectra

### [EMIm][PCl<sub>6</sub>] (1)

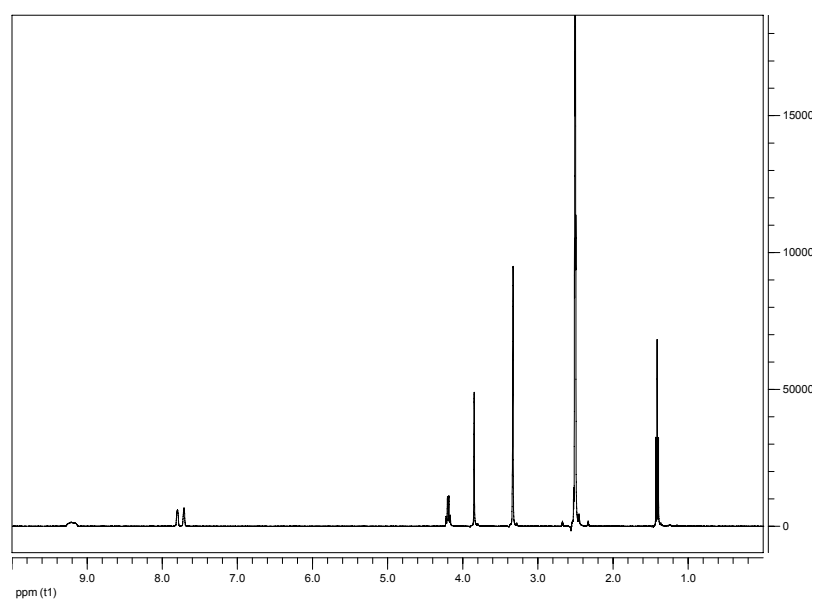

Fig. S1 <sup>1</sup>H NMR spectrum of [EMIm][PCl<sub>6</sub>] (1) (DMSO, 400 MHz, 25 °C).

### [EMIm][NbCl<sub>6</sub>] (2)

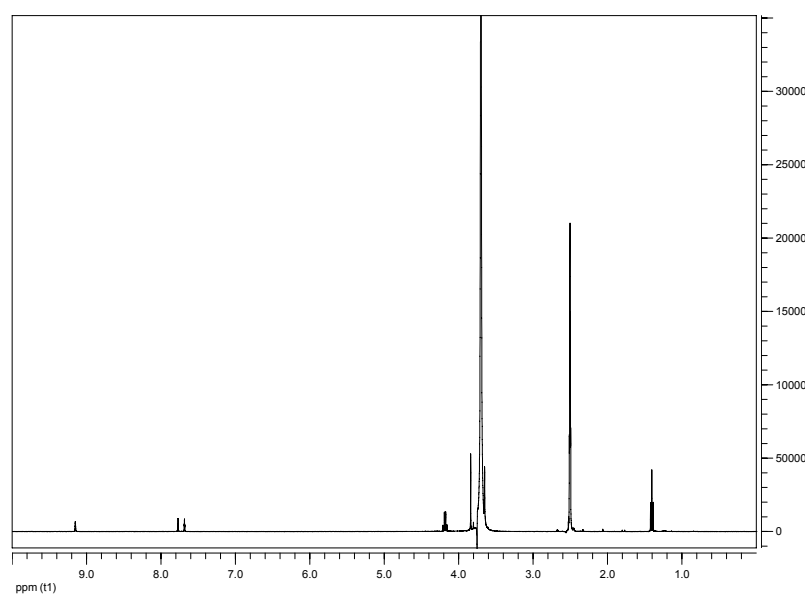

Fig. S2 <sup>1</sup>H NMR spectrum of [EMIm][NbCl<sub>6</sub>] (2) (DMSO, 400 MHz, 25 °C).

**[1,4-BMPy][PCl<sub>6</sub>] (3)**

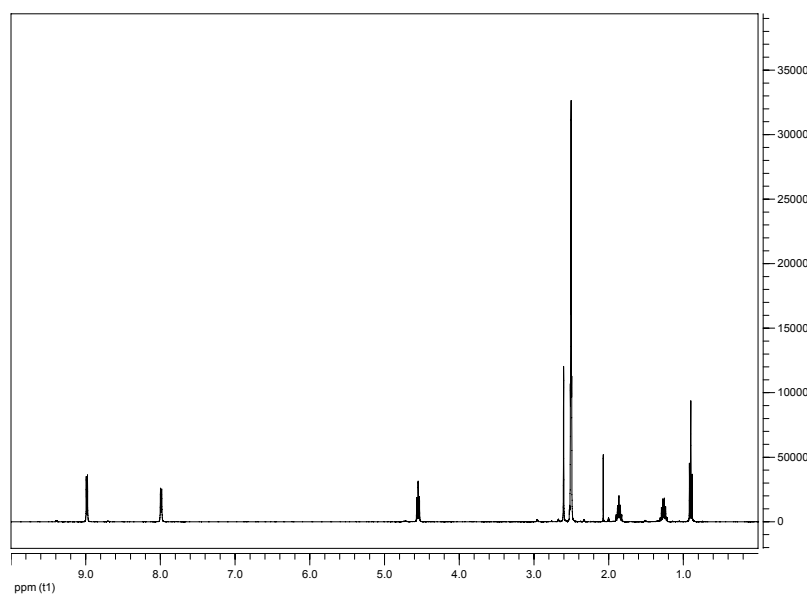

**Fig. S3** <sup>1</sup>H NMR spectrum of [1,4-BMPy][PCl<sub>6</sub>] (**3**) (DMSO, 400 MHz, 25 °C).

**[1,4-BMPy][NbCl<sub>6</sub>] (4)**

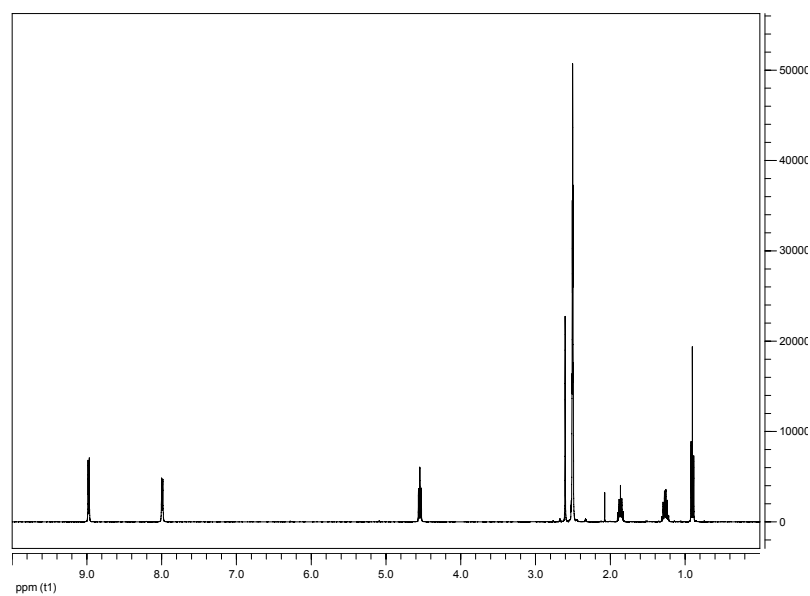

**Fig. S4** <sup>1</sup>H NMR spectrum of [1,4-BMPy][NbCl<sub>6</sub>] (**4**) (DMSO, 400 MHz, 25 °C).

**[1,3-BMPy][NbCl<sub>6</sub>] (5)**

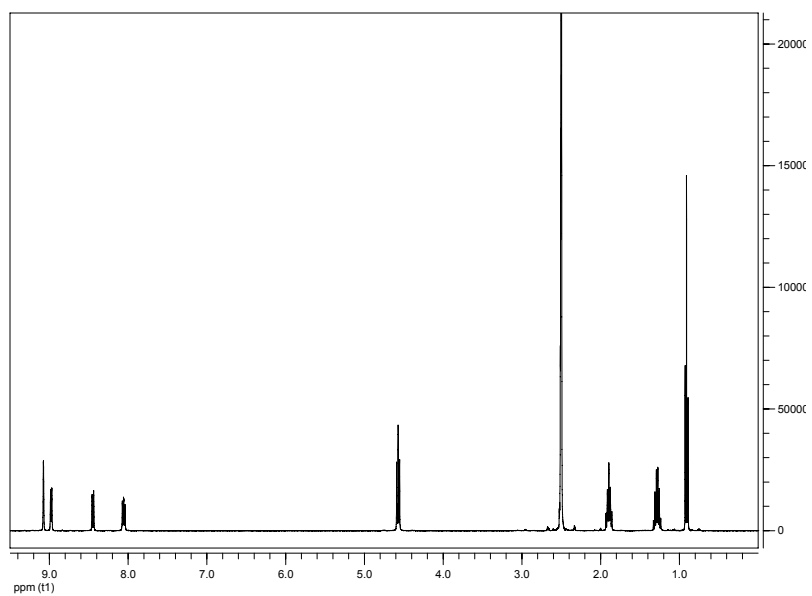

**Fig. S5** <sup>1</sup>H NMR spectrum of [1,3-BMPy][NbCl<sub>6</sub>] (5) (DMSO, 400 MHz, 25 °C).

## Raman spectra

### [EMIm][PCl<sub>6</sub>] (1)

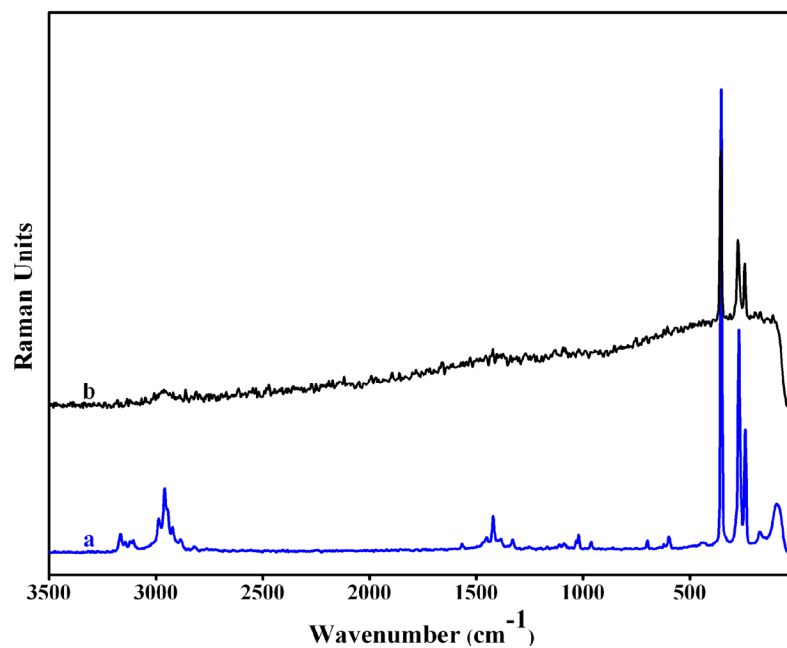

**Fig. S6** FT-Raman spectra (Nd:YAG laser,  $\lambda_{\text{exc.}} = 1064$  nm) of crystalline (RT) (a) and liquid (175 °C) (b) [EMIm][PCl<sub>6</sub>] (1). (Raman intensity in arbitrary units).

### [EMIm][NbCl<sub>6</sub>] (2)

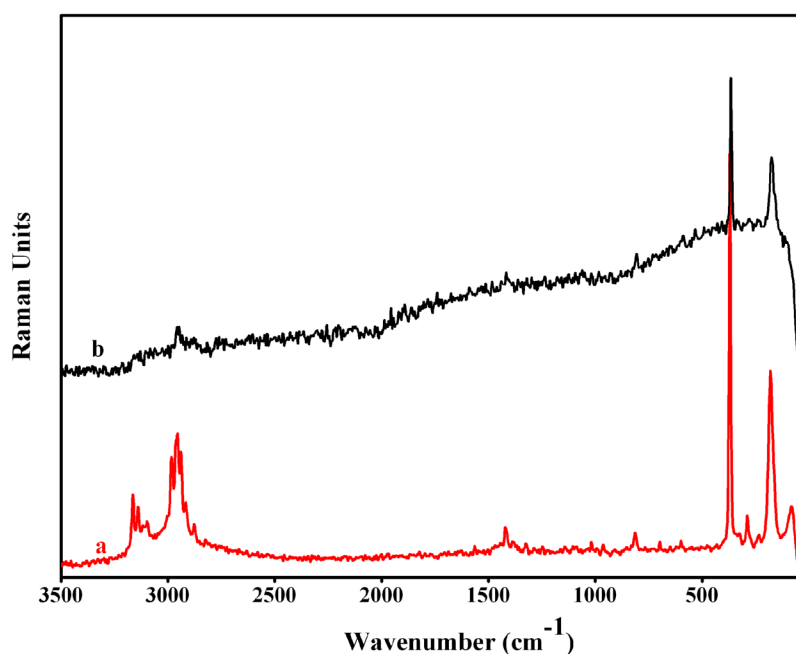

**Fig. S7** FT-Raman spectra (Nd:YAG laser,  $\lambda_{\text{exc.}} = 1064$  nm) of crystalline (RT) (a) and liquid (150 °C) (b) [EMIm][NbCl<sub>6</sub>] (2). (Raman intensity in arbitrary units).

### [1,4-BMPy][PCl<sub>6</sub>] (3)

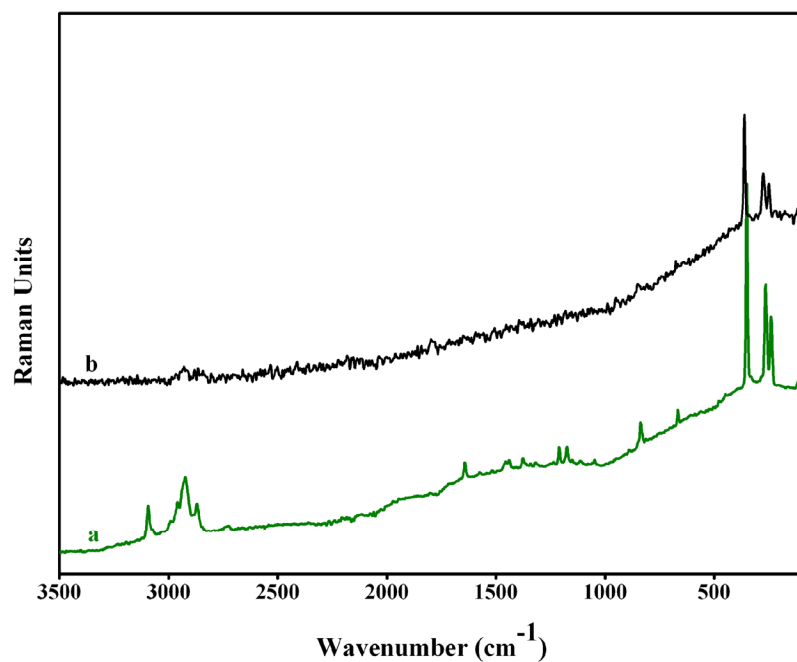

**Fig. S8** FT-Raman spectra (Nd:YAG laser,  $\lambda_{\text{exc.}} = 1064$  nm) of crystalline (RT) (a) and liquid (100 °C) (b) [1,4-BMPy][PCl<sub>6</sub>] (3). (Raman intensity in arbitrary units).

### [1,4-BMPy][NbCl<sub>6</sub>] (4)

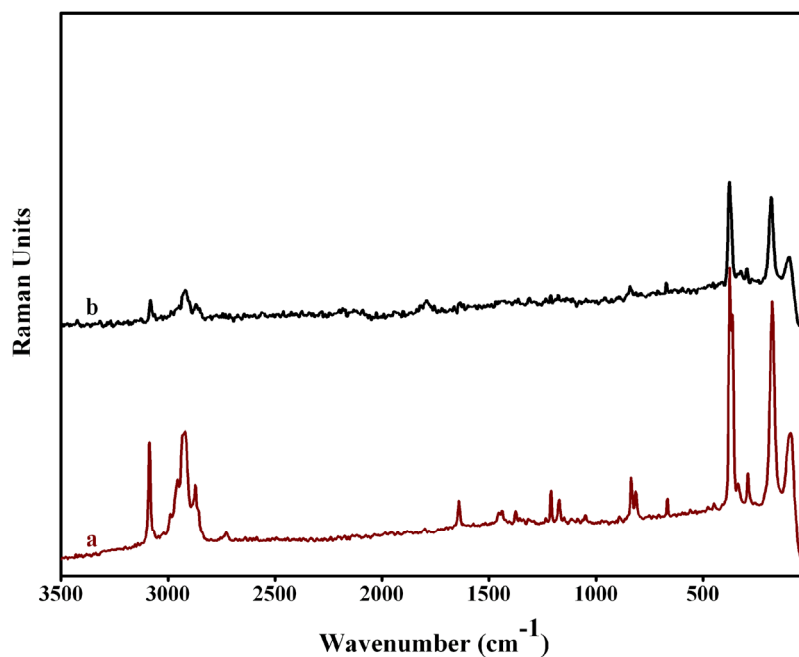

**Fig. S9** FT-Raman spectra (Nd:YAG laser,  $\lambda_{\text{exc.}} = 1064$  nm) of crystalline (RT) (a) and liquid (100 °C) (b) [1,4-BMPy][NbCl<sub>6</sub>] (4). (Raman intensity in arbitrary units).

**[1,3-BMPy][NbCl<sub>6</sub>] (5)**

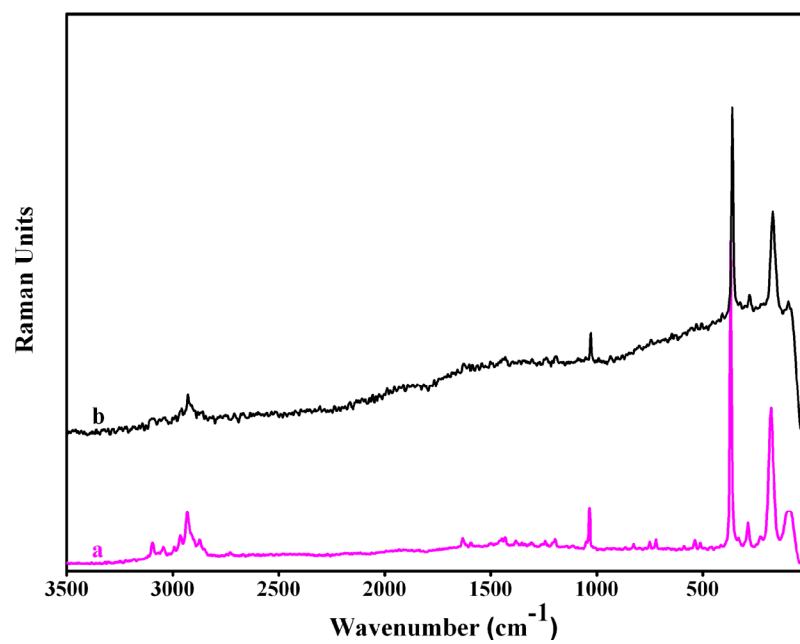

**Fig. S10** FT-Raman spectra (Nd:YAG laser,  $\lambda_{\text{exc.}} = 1064$  nm) of crystalline (RT) (a) and liquid (100 °C) (b) [1,3-BMPy][NbCl<sub>6</sub>] (5). (Raman intensity in arbitrary units).

### DSC traces

#### [1,4-BMPy][PCl<sub>6</sub>] (3)

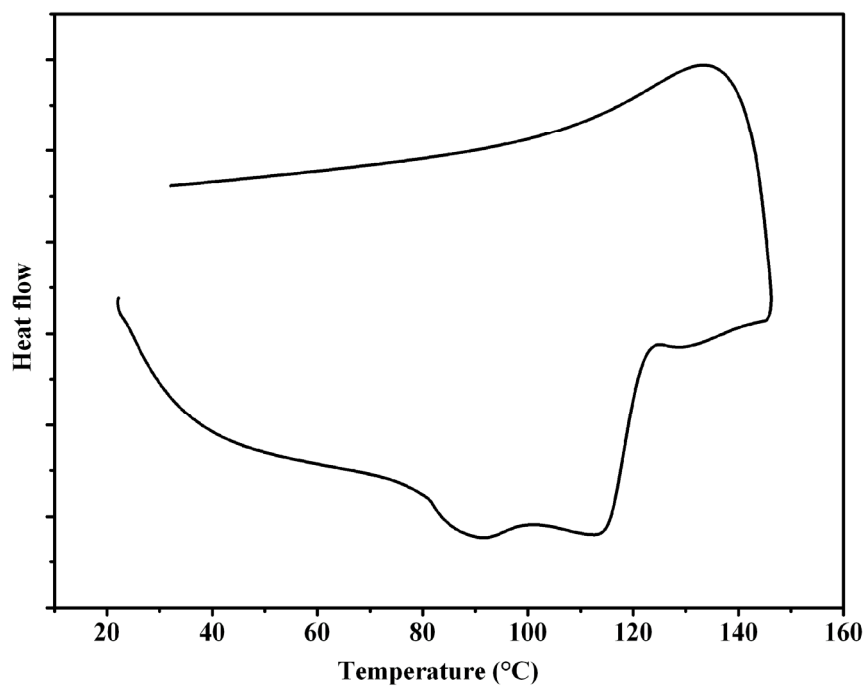

Fig. S11 Differential scanning calorimetry results for compound (3)

#### [1,4-BMPy][NbCl<sub>6</sub>] (4)

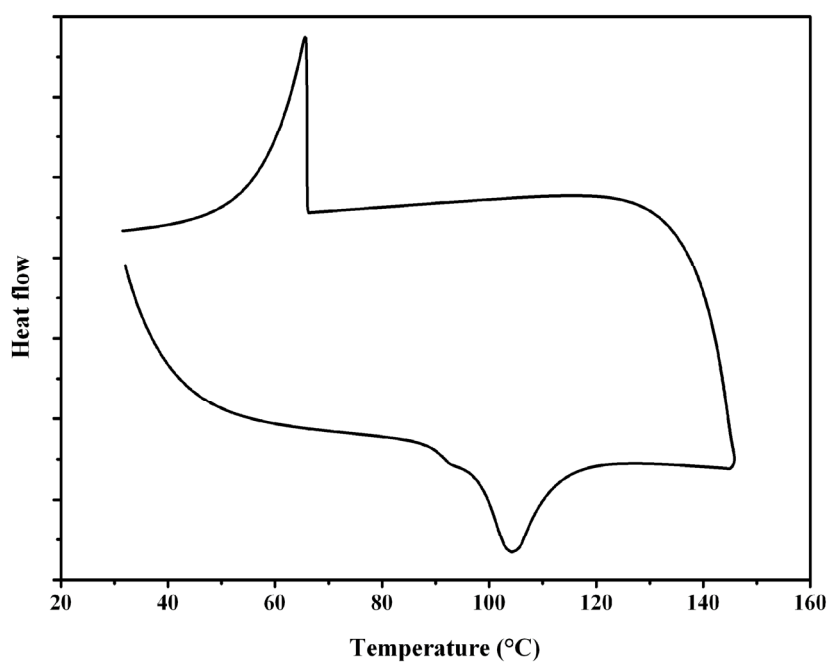

Fig. S12 Differential scanning calorimetry results for compound (4)



**[1,3-BMPy][NbCl<sub>6</sub>] (5)**

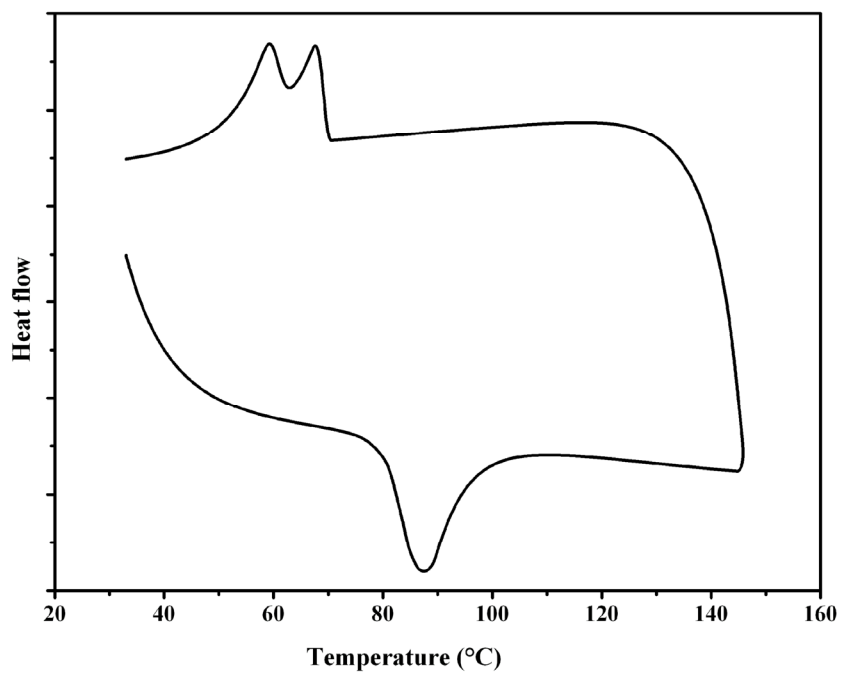

**Fig. S13** Differential scanning calorimetry results for compound (5)

**Table S1** Selected internuclear distances (Å) and angles (°) for **1 – 5**

[EMIm][PCl<sub>6</sub>] (1)

|                   |           |                   |           |
|-------------------|-----------|-------------------|-----------|
| P – Cl(1)         | 2.121(1)  | P – Cl(4)         | 2.140(1)  |
| P – Cl(2)         | 2.131(1)  | P – Cl(5)         | 2.149(1)  |
| P – Cl(3)         | 2.134(1)  | P – Cl(6)         | 2.151(1)  |
| Cl(1) – P – Cl(2) | 90.217(4) | Cl(2) – P – Cl(5) | 179.42(5) |
| Cl(1) – P – Cl(3) | 90.45(4)  | Cl(3) – P – Cl(5) | 90.01(3)  |
| Cl(2) – P – Cl(3) | 90.51(4)  | Cl(4) – P – Cl(5) | 89.78(4)  |
| Cl(1) – P – Cl(4) | 179.07(5) | Cl(1) – P – Cl(6) | 90.45(4)  |
| Cl(2) – P – Cl(4) | 90.48(4)  | Cl(2) – P – Cl(6) | 89.88(4)  |
| Cl(3) – P – Cl(4) | 90.21(4)  | Cl(3) – P – Cl(6) | 179.02(4) |
| Cl(1) – P – Cl(5) | 89.51(4)  | Cl(4) – P – Cl(6) | 88.89(4)  |

[EMIm][NbCl<sub>6</sub>] (2)

|                       |           |                        |           |
|-----------------------|-----------|------------------------|-----------|
| Nb(1) – Cl(1)         | 2.334(1)  | Nb(2) – Cl(7)          | 2.335(1)  |
| Nb(1) – Cl(2)         | 2.340(1)  | Nb(2) – Cl(8)          | 2.338(1)  |
| Nb(1) – Cl(3)         | 2.345(1)  | Nb(2) – Cl(9)          | 2.344(1)  |
| Nb(1) – Cl(4)         | 2.350(1)  | Nb(2) – Cl(10)         | 2.347(1)  |
| Nb(1) – Cl(5)         | 2.355(1)  | Nb(2) – Cl(11)         | 2.363(1)  |
| Nb(1) – Cl(6)         | 2.371(1)  | Nb(2) – Cl(12)         | 2.369(1)  |
| Cl(1) – Nb(1) – Cl(2) | 90.55(3)  | Cl(7) – Nb(2) – Cl(8)  | 92.14(3)  |
| Cl(1) – Nb(1) – Cl(3) | 92.62(3)  | Cl(7) – Nb(2) – Cl(9)  | 90.00(2)  |
| Cl(2) – Nb(1) – Cl(3) | 176.82(3) | Cl(8) – Nb(2) – Cl(9)  | 89.43(3)  |
| Cl(1) – Nb(1) – Cl(4) | 89.25(2)  | Cl(8) – Nb(2) – Cl(10) | 177.19(3) |
| Cl(2) – Nb(1) – Cl(4) | 91.02(3)  | Cl(9) – Nb(2) – Cl(10) | 90.81(3)  |
| Cl(3) – Nb(1) – Cl(4) | 88.71(3)  | Cl(7) – Nb(2) – Cl(11) | 88.38(2)  |
| Cl(4) – Nb(1) – Cl(5) | 176.60(3) | Cl(9) – Nb(2) – Cl(11) | 178.20(2) |
| Cl(1) – Nb(1) – Cl(6) | 178.00(3) | Cl(7) – Nb(2) – Cl(12) | 177.62(3) |
| Cl(2) – Nb(1) – Cl(6) | 87.61(3)  | Cl(8) – Nb(2) – Cl(12) | 91.72(3)  |

[1,4-BMPy][PCl<sub>6</sub>] (3)

|                   |           |                   |           |
|-------------------|-----------|-------------------|-----------|
| P – Cl(1)         | 2.114(1)  | P – Cl(4)         | 2.144(1)  |
| P – Cl(2)         | 2.138 (1) | P – Cl(5)         | 2.149(1)  |
| P – Cl(3)         | 2.142(1)  | P – Cl(6)         | 2.159(1)  |
| Cl(1) – P – Cl(2) | 91.13(5)  | Cl(2) – P – Cl(5) | 178.71(7) |
| Cl(1) – P – Cl(3) | 90.85(6)  | Cl(3) – P – Cl(5) | 90.32(5)  |
| Cl(2) – P – Cl(3) | 89.89(5)  | Cl(4) – P – Cl(5) | 89.73(5)  |
| Cl(1) – P – Cl(4) | 90.08(6)  | Cl(1) – P – Cl(6) | 179.33(7) |

|                                    |           |                        |           |
|------------------------------------|-----------|------------------------|-----------|
| Cl(2) – P – Cl(4)                  | 90.04(5)  | Cl(2) – P – Cl(6)      | 89.33(5)  |
| Cl(3) – P – Cl(4)                  | 179.07(7) | Cl(3) – P – Cl(6)      | 89.63(6)  |
| Cl(1) – P – Cl(5)                  | 90.15(5)  | Cl(4) – P – Cl(6)      | 89.44(5)  |
| [1,4-BMPy][NbCl <sub>6</sub> ] (4) |           |                        |           |
| Nb – Cl(1)                         | 2.324(1)  | Nb – Cl(4)             | 2.346(1)  |
| Nb – Cl(2)                         | 2.340(1)  | Nb – Cl(5)             | 2.348(1)  |
| Nb – Cl(3)                         | 2.341(1)  | Nb – Cl(6)             | 2.381(1)  |
| Cl(1) – Nb – Cl(2)                 | 91.02(5)  | Cl(2) – Nb – Cl(5)     | 89.68(4)  |
| Cl(1) – Nb – Cl(3)                 | 91.53(4)  | Cl(3) – Nb – Cl(5)     | 178.06(4) |
| Cl(2) – Nb – Cl(3)                 | 89.39(4)  | Cl(4) – Nb – Cl(5)     | 90.64(4)  |
| Cl(1) – Nb – Cl(4)                 | 90.92(6)  | Cl(1) – Nb – Cl(6)     | 179.16(4) |
| Cl(2) – Nb – Cl(4)                 | 178.04(5) | Cl(2) – Nb – Cl(6)     | 88.62(4)  |
| Cl(3) – Nb – Cl(4)                 | 90.23(4)  | Cl(3) – Nb – Cl(6)     | 89.22(4)  |
| Cl(1) – Nb – Cl(5)                 | 90.18(4)  | Cl(4) – Nb – Cl(6)     | 89.44(5)  |
| [1,3-BMPy][NbCl <sub>6</sub> ] (5) |           |                        |           |
| Nb(1) – Cl(1)                      | 2.333(1)  | Nb(2) – Cl(7)          | 2.332(1)  |
| Nb(1) – Cl(2)                      | 2.340(1)  | Nb(2) – Cl(8)          | 2.345(1)  |
| Nb(1) – Cl(3)                      | 2.353(1)  | Nb(2) – Cl(9)          | 2.344(1)  |
| Nb(1) – Cl(4)                      | 2.353(1)  | Nb(2) – Cl(7)          | 2.351(1)  |
| Nb(1) – Cl(5)                      | 2.354(1)  | Nb(2) – Cl(11)         | 2.360(1)  |
| Nb(1) – Cl(6)                      | 2.363(1)  | Nb(2) – Cl(12)         | 2.361(1)  |
| Cl(1) – Nb(1) – Cl(2)              | 89.01(5)  | Cl(7) – Nb(1) – Cl(8)  | 90.10(5)  |
| Cl(1) – Nb(1) – Cl(3)              | 90.94(5)  | Cl(7) – Nb(1) – Cl(9)  | 90.97(5)  |
| Cl(2) – Nb(1) – Cl(3)              | 90.48(5)  | Cl(8) – Nb(1) – Cl(9)  | 91.04(5)  |
| Cl(1) – Nb(1) – Cl(4)              | 177.15(5) | Cl(8) – Nb(1) – Cl(10) | 179.47(4) |
| Cl(2) – Nb(1) – Cl(4)              | 88.74(5)  | Cl(9) – Nb(1) – Cl(10) | 88.71(4)  |
| Cl(3) – Nb(1) – Cl(5)              | 177.48(5) | Cl(7) – Nb(1) – Cl(11) | 177.69(5) |
| Cl(4) – Nb(1) – Cl(5)              | 88.76(5)  | Cl(8) – Nb(1) – Cl(11) | 89.23(5)  |
| Cl(1) – Nb(1) – Cl(6)              | 91.08(5)  | Cl(9) – Nb(1) – Cl(11) | 91.25(5)  |
| Cl(2) – Nb(1) – Cl(6)              | 178.62(5) | Cl(9) – Nb(1) – Cl(12) | 178.23(5) |

---

**Table S2** Raman frequencies ( $\text{cm}^{-1}$ ) of crystalline [EMIm] [PCl<sub>6</sub>] (**1**) and of crystalline [1,4-BMPy] [PCl<sub>6</sub>] (**3**) in the [PCl<sub>6</sub>]<sup>-</sup> relevant spectral region along with their estimated intensities and proposed assignment

| [EMIm][PCl <sub>6</sub> ] ( <b>1</b> ) | [1,4-BMPy][PCl <sub>6</sub> ] ( <b>3</b> ) | [PCl <sub>6</sub> ] <sup>-</sup> <sup>29,30</sup> | Assignment / O <sub>h</sub> mode description |
|----------------------------------------|--------------------------------------------|---------------------------------------------------|----------------------------------------------|
| 440 vw, br <sup>a)</sup>               |                                            | 444                                               | $\nu_3 / F_{1u} : \nu_{as}$                  |
| 353 vvs                                | 351 vvs                                    | 360                                               | $\nu_1 / A_{1g} : \nu_s$                     |
| 270 vs                                 | 265 vs                                     | 283                                               | $\nu_2 / E_g : \nu (+ \nu_4 / F_{1u})?$      |
| 240 s                                  | 240 s                                      | 238                                               | $\nu_5 / F_{2g} : \delta$                    |
| 172 vw, br <sup>b)</sup>               |                                            | (168) <sup>c)</sup>                               | $\nu_6 / F_{2u} : \delta$                    |
| 92 br                                  | 91 br                                      |                                                   | Lattice vibration                            |

Estimated intensities: s: strong, m: medium, w: weak, v: very, br: broad.  $\nu$  : stretching,  $\delta$  : bending.

<sup>a)</sup> <sup>b)</sup> [EMIm]<sup>+</sup> bands, <sup>c)</sup> Estimated value.<sup>30</sup>

**Footnote 1.** Raman ( $\text{cm}^{-1}$  / intensity) of crystalline [EMIm] [PCl<sub>6</sub>]: 3166 m, 3144 w, 3120 vw, 3106 vw, 2988 m, 2959 s, 2945 sh, 2922 w, 2885 vw, 2820 vw, 1566 w, 1450 w, 1420 m-s, 1386 vw, 1329 w, 1088 vw, 1036 sh, 1020 w-m, 962 w, 698 w, 597 w-m, 440 vw, br, 353 vvs, 270 vs, 240 s, 172 vw, br, 92 br.

**Footnote 2.** Raman ( $\text{cm}^{-1}$  / intensity) of crystalline [1,4-BMPy] [PCl<sub>6</sub>]: 3094 s, 2997 sh, 2959 sh, 2923 vs, 2870 m, 1643 m, 1452 w, 1439 w-m, 1377w-m, 1211 m, 1175 m, 1048 w, 893 w, 837 m-s, 667 m, 351 vvs, 265 vs, 240 s, 91 br.

**Table S3** Raman frequencies ( $\text{cm}^{-1}$ ) of crystalline [EMIm][NbCl<sub>6</sub>] (**2**) and of crystalline, [1,4-BMPy][NbCl<sub>6</sub>] (**4**) and [1,3-BMPy][NbCl<sub>6</sub>] (**5**) in the [NbCl<sub>6</sub>]<sup>-</sup> relevant spectral region along with their estimated intensities and proposed assignment

| [EMIm][NbCl <sub>6</sub> ] ( <b>2</b> ) | [1,4-BMPy][NbCl <sub>6</sub> ] ( <b>4</b> ) | [1,3-MPy][NbCl <sub>6</sub> ] ( <b>5</b> ) | [NbCl <sub>6</sub> ] <sup>-20</sup> | Assignment / O <sub>h</sub> mode description |
|-----------------------------------------|---------------------------------------------|--------------------------------------------|-------------------------------------|----------------------------------------------|
|                                         | 448 w                                       |                                            |                                     | [BMPy] <sup>+</sup>                          |
| 370 vvs                                 | 375 vvs                                     | 368 vs                                     | 375 vs, br                          | $\nu_1 / A_{1g} : \nu_s$                     |
|                                         | 363 sh                                      |                                            |                                     | $(\nu_3 / F_{1u} : \nu_{as})$                |
|                                         | 336 w                                       | 332 w                                      |                                     | [BMPy] <sup>+</sup>                          |
| 288 w-m                                 | 290 m                                       | 287 m-s                                    | 287 w                               | $\nu_2 / E_g : \nu$                          |
| 240 vw                                  |                                             |                                            |                                     | [EMIm] <sup>+</sup>                          |
| 179 vs                                  | 176 vs                                      | 177 vs                                     | 182m, sh<br>177 s                   | $\nu_5 / F_{2g} : \delta$                    |
| 81 m                                    | 90 s                                        | 92 br                                      |                                     | Lattice vibration                            |

Estimated intensities: s: strong, m: medium, w: weak, v: very, br: broad.  $\nu$  : stretching,  $\delta$  : bending.

**Footnote 3.** Raman ( $\text{cm}^{-1}$  / intensity) of crystalline [EMIm][NbCl<sub>6</sub>]: 3164 m, 3139 m, 3102 w, 2983 m-s, 2955 s, 2939 sh, 2916 w, 2876 w, 1563 w, 1421 w-m, 1332 w, 1250 vw, 1022 w, 964 w, 813 w (trace of NbOCl<sub>3</sub>), 702 vw, 600 vw, 370 vvs, 340 vw (trace of NbOCl<sub>3</sub>), 288 w-m, 240 vw, 179 vs, 81 m.

**Footnote 4.** Raman ( $\text{cm}^{-1}$  / intensity) of crystalline [1,4-BMPy][NbCl<sub>6</sub>]: 3087 s, 2998 sh, 2955 sh, 2920 vs, 2871 m, 2728 w, 1641 m, 1454 w, 1438 m, 1375 m, 1210 m-s, 1172 m, 1049 w, 891 w, 836 m-s, 814 m, 666 m, 448 w, 375 vs, 363 sh, 336 w, 290 m, 176 vs, 90 s.

**Footnote 5.** Raman ( $\text{cm}^{-1}$  / intensity) of crystalline [1,3-BMPy][NbCl<sub>6</sub>]: 3095 m, 3044 m, 2995 w, 2964 m, 2931 s, 2872 m, 1632 w-m, 1432 w-m, 1382 w, 1243 w, 1196 w-m, 1035 s, 826 w, 750 w, 721 w-m, 586 w, 537 w-m, 512 w, 368 vvs, 332 vw, 287 m-s, 227 w, 177 vs, 92 br.
